# Supplementary material
Source: PubMed Central journal article supplement (PMC4994792)
Supplement: DS_10.1177_0706743716660033.pdf [file DS_10.1177_0706743716660033.pdf]

Supplemental Table 4.1. A Summary of MST Parameters Used In Studies.

|                                           | Type of Study  | Charac (N; F:M; mean age)      | Number of Treatments | Device/ Placement | Dosing (Duration; Frequency) | Anesthetic | ECT | Primary Outcome                  | Categoric outcome                         | Side Effects                                                   |
|-------------------------------------------|----------------|--------------------------------|----------------------|-------------------|------------------------------|------------|-----|----------------------------------|-------------------------------------------|----------------------------------------------------------------|
| Lisanby SH, et al. (2001) <sup>1</sup>    | CR             | 20 yo, W                       | 4(+8 RUL ECT)        | MSSR; Vtx         | 6.2x; 40%                    | Elm; Thp   | N/A | HDRS-17: 20 to 6                 | Rem                                       | None                                                           |
| Kosel M, et al. (2003) <sup>2</sup>       | CR             | 66 yo, W                       | 12                   | MSSR; Vtx         | 8s; 50Hz                     | Alf; Etm   | N/A | HDRS-21: 33 to 6                 | Rem                                       | Reorientation n 4.8 min                                        |
| Lisanby SH, et al. (2003) <sup>3</sup>    | RCT C-O        | 10(7:3); 46.7yo                | 2(+10 ECT)           | MSSR; Vtx         | 6.6s; 60Hz                   | Mth        | N/A | HDRS-24: 27.5 to 9.4             | All Substantial improvement               | Fewer headaches, muscle aches, and faster reorientation        |
| White PF, et al. (2006) <sup>4</sup>      | OL MST ECT     | 10(6:4); 48<br>10(6:4); 49     | 10-12<br>10-12       | MSSR; N.R.(*1)    | 8s; 50Hz                     | Etm        | Yes | HDRS-17: 32 to 14<br>30 to 6     | NR                                        | Reorientation 4min<br>18min                                    |
| Kirov G, et al. (2008) <sup>5</sup>       | OL C-O         | 11(8:3)                        | 1(+12 ECT)           | MSTh: Vtx or Fz   | 10s; 100Hz                   | Etm        | N/A | NR                               | NR                                        | Reorientation 7min vs 26                                       |
| Kayser S, et al. (2011) <sup>6</sup>      | RCT OL MST ECT | 10(6:4); 48.8<br>10(7:3); 52.8 | 12<br>12             | MgP:Vtx           | 10s; 100Hz                   | Ppf        | Yes | MDRS 31.2 to 15.9;<br>26.3 to 16 | 60% Res(30% Rem)<br>40% Res/Rem           | Reorientation 2:16'' vs 8':21''<br>No differences in cognition |
| Fitzgerald PB, et al. (2013) <sup>7</sup> | OL             | 13(10:3); 46                   | Up to 18             | MgP:Vtx           | 10s; 100Hz                   | Ppf        | No  | MDRS 39 to 26                    | 38.5% Res (No Rem)                        | Reorientation 3min;<br>No evidence of cognitive impairment     |
| Kayser S, et al. (2013) <sup>8</sup>      | OL C-O         | 7(2:5); 43.4                   | 12                   | MgP:Vtx           | 6s; 100Hz                    | Ppf        | Yes | HDRS-28: 29.1 to 25              | All non-responders; non-responders to ECT | Reorientation 2 min vs 7 min                                   |
| Polster JD, et al. (2015) <sup>9</sup>    | OL MST ECT     | 10(3:7); 43.7<br>10(6:4); 54.7 | 12                   | MgP:Vtx           | 6s; 100Hz                    | Ppf        | Yes | HDRS-Endpoint NR                 | NR                                        | Less impact on memory                                          |
| Soehle M, et al. (2014) <sup>10</sup>     | OL MST ECT     | 10(3:7); 45<br>10(4:6); 55     | NR                   | MgP:Vtx           | 6s; 100Hz                    | Ppf        | Yes | NR                               | NR                                        | Better post-ictal recovery, higher post-ictal BIS values       |
| Noda Y, et al. (2014) <sup>11</sup>       | CR             | 18yr; M                        | 18+9                 | MgP:F3/F4         | 10s; 100Hz                   | Mth        | No  | HDRS-24: 21 to 3                 | Remitter                                  | Nausea; 4 prolonged seizures                                   |
| Noda Y, et al. (2014) <sup>12</sup>       | CR             | 61 yr M & 17 yo W              | 6:21                 | MgP:F3/F4         | 10s; 100Hz                   | Mth        | No  | HDRS-24: 27 to 3; 33 to 4        | Shift of phase                            | Induction of mania (1 with psychosis)                          |
| Kayser S, et al. (2015) <sup>13</sup>     | OL             | 26**(12:14); 47                | 12; up to 22         | MgP: Vtx          | 10s; 100Hz                   | Ppf        | No  | HDRS-28: 29 to 14                | 69% Res; 46% Rem                          | No cognitive impairment                                        |

CR: Case Report; OL: Open-Label; RCT: Randomized Control Trial; C-O: Cross-Over; MSSR: Magstim Super Rapid; MSTh: Magstim Theta; MgP: MagPro MST; Vtx: Vertex; Etm: Etomidate; Mth: Methohexital; Ppf: Propofol; Rmf: Remifentanyl; HDRS (17, 21, 24): Hamilton Depression Rating Scale version 17-, 21-, 24-item; Rem: Remission; Res: Response; NR: Not reported (authors contacted; no response).

\* Authors contacted; no reply ; \*\* 10 Patients are included; already reported in Kayser S, et al 2011

**REFERENCES**

1. Lisanby SH, Schlaepfer TE, Fisch HU, et al. Magnetic seizure therapy of major depression. *Arch Gen Psychiatry*. 2001;58:303-5.
2. Kosel M, Frick C, Lisanby SH, et al. Magnetic seizure therapy improves mood in refractory major depression. *Neuropsychopharmacology*. 2003;28:2045-8.
3. Lisanby SH, Luber B, Schlaepfer TE, et al. Safety and feasibility of magnetic seizure therapy (MST) in major depression: randomized within-subject comparison with electroconvulsive therapy. *Neuropsychopharmacology*. 2003;28:1852-65.
4. White PF, Amos Q, Zhang Y, et al. Anesthetic considerations for magnetic seizure therapy: a novel therapy for severe depression. *Anesth Analg*. 2006;103:76-80.
5. Kirov G, Ebmeier KP, Scott AI, et al. Quick recovery of orientation after magnetic seizure therapy for major depressive disorder. *Br J Psychiatry*. 2008;193:152-5.
6. Kayser S, Bewernick BH, Grubert C, et al. Antidepressant effects, of magnetic seizure therapy and electroconvulsive therapy, in treatment-resistant depression. *J Psychiatr Res*. 2011;45:569-76.
7. Fitzgerald PB, Hoy KE, Herring SE, et al. Pilot study of the clinical and cognitive effects of high-frequency magnetic seizure therapy in major depressive disorder. *Depress Anxiety*. 2013;30:129-36.
8. Kayser S, Bewernick BH, Hurlmann R, et al. Comparable seizure characteristics in magnetic seizure therapy and electroconvulsive therapy for major depression. *Eur Neuropsychopharmacol*. 2013;23:1541-50.
9. Polster JD, Kayser S, Bewernick BH, et al. Effects of electroconvulsive therapy and magnetic seizure therapy on acute memory retrieval. *J ECT*. 2015;3:13-9.
10. Soehle M, Kayser S, Ellerkmann RK, et al. Bilateral bispectral index monitoring during and after electroconvulsive therapy compared with magnetic seizure therapy for treatment-resistant depression. *Br J Anaesth*. 2014;112:695-702.
11. Noda Y, Daskalakis ZJ, Downar J, et al. Magnetic seizure therapy in an adolescent with refractory bipolar depression: a case report. *Neuropsychiatr Dis Treat*. 2014;10:2049-55.
12. Noda Y, Daskalakis ZJ, Fitzgerald PB, et al. Magnetic seizure therapy-induced mania: a report of 2 cases. *J ECT*. 2015;31:e4-6.
13. Kayser S, Bewernick BH, Matusch A, et al. Magnetic seizure therapy in treatment-resistant depression: clinical, neuropsychological and metabolic effects. *Psychol Med*. 2015;45:1073-92.
